# Supplementary material for: Electrospinning-derived ultrafine silver–carbon composite nanofibers for flexible transparent conductive films
Source: Royal Society of Chemistry journal article supplement (doi:10.1039/c5ra17650f), 2015-01-01
Supplement: c5ra17650f1.pdf [file c5ra17650f1.pdf]

## Supporting Information

# Electrospinning-derived ultrafine silver-carbon composite nanofibers for flexible transparent conductive films

*Liwen Zhang<sup>a</sup>, Yejun Qiu<sup>a,\*</sup>, Hong Liu<sup>b</sup>*

<sup>a</sup>Shenzhen Engineering Lab of Flexible Transparent Conductive Films, Department of Materials Science and Engineering, Shenzhen Graduate School, Harbin Institute of Technology, University Town, Shenzhen, 518055, China

<sup>b</sup>School of Materials Science and Engineering, South China University of Technology, Guangzhou, 510640, China

---

\*Corresponding authors. Tel.: +86-755-26032462; fax: +86-755-26033504.  
E-mail addresses: yejunqiu@hitsz.edu.cn.

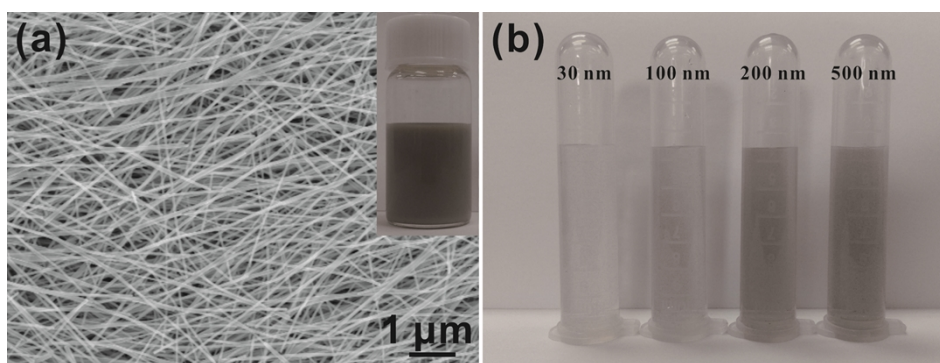

Fig. S1 (a) SEM image and optical photo of silver nanowire with average diameter of about 50 nm and average length of 20 μm; (b) optical photo of dispersive solutions containing Ag/CNFs with different diameter from 30 nm to 500 nm.

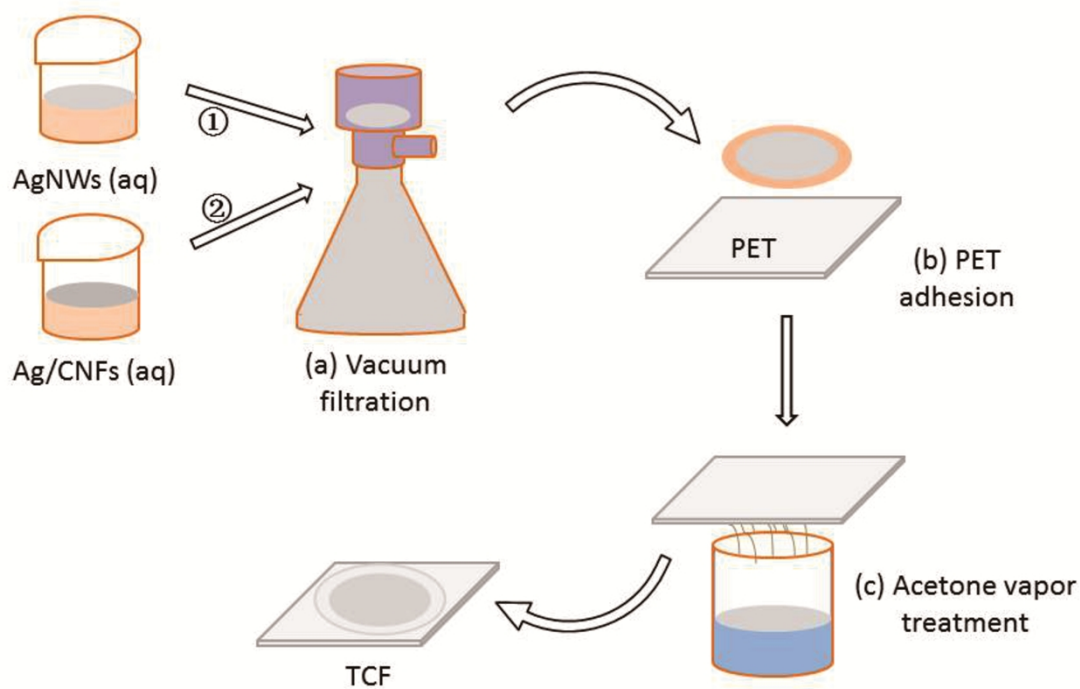

Fig. S2 Schematic diagram of TCF fabrication: (a) suction filtration through membrane; (b) PET transfer; (c) treatment in acetone vapor.

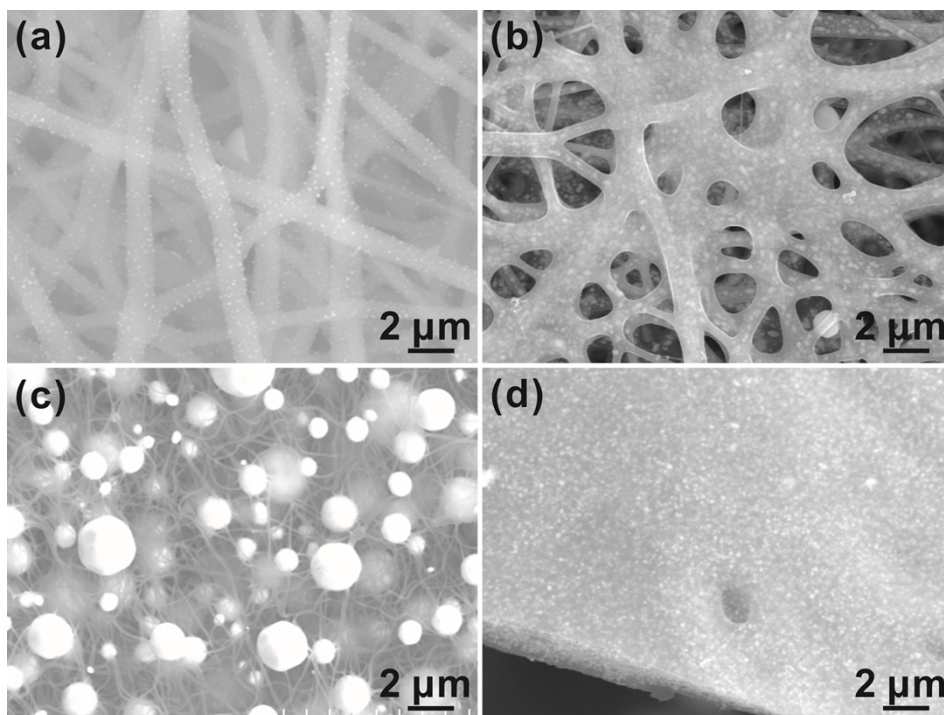

Fig. S3 SEM images of Ag/CNFs composite samples fabricated using different conditions: (a) without glucose; (b) with pre-oxidation treatment; (c) with high flow rate of NH<sub>3</sub>; (d) with weight ratio of 1:1 between AgNO<sub>3</sub> and PAN.

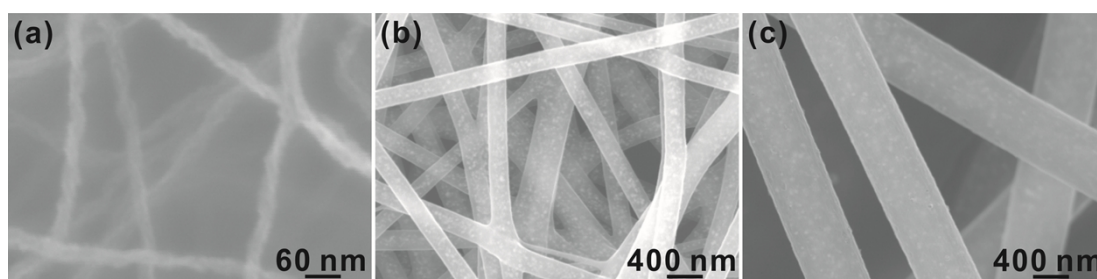

Fig. S4 SEM images of Ag/CNFs with different diameter: (a) 30 nm; (b) 200 nm; (c) 500 nm.

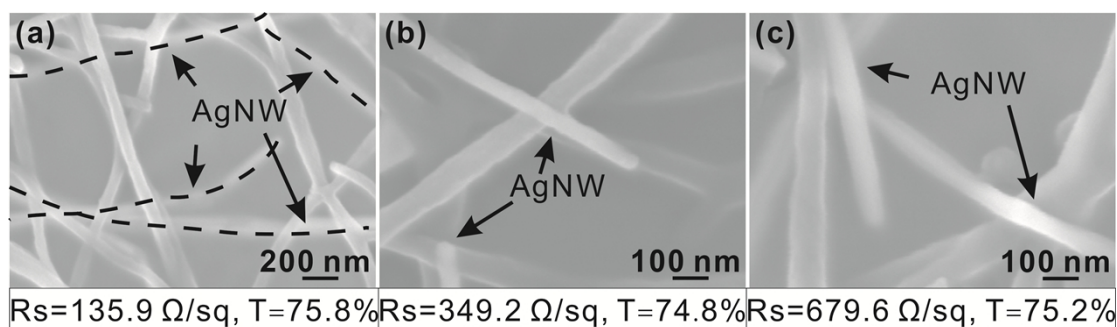

Fig. S5 SEM images of TCFs produced by different deposition orders: (a) deposition

of first AgNWs and then Ag/CNFs; (b) deposition of first Ag/CNFs and then AgNWs; (c) deposition of AgNW and Ag/CNFs mixture. The dash line represents AgNWs buried under Ag/CNFs, and the arrows indicate deformed AgNWs induced by flexibility of AgNWs and large diameter of Ag/CNFs.

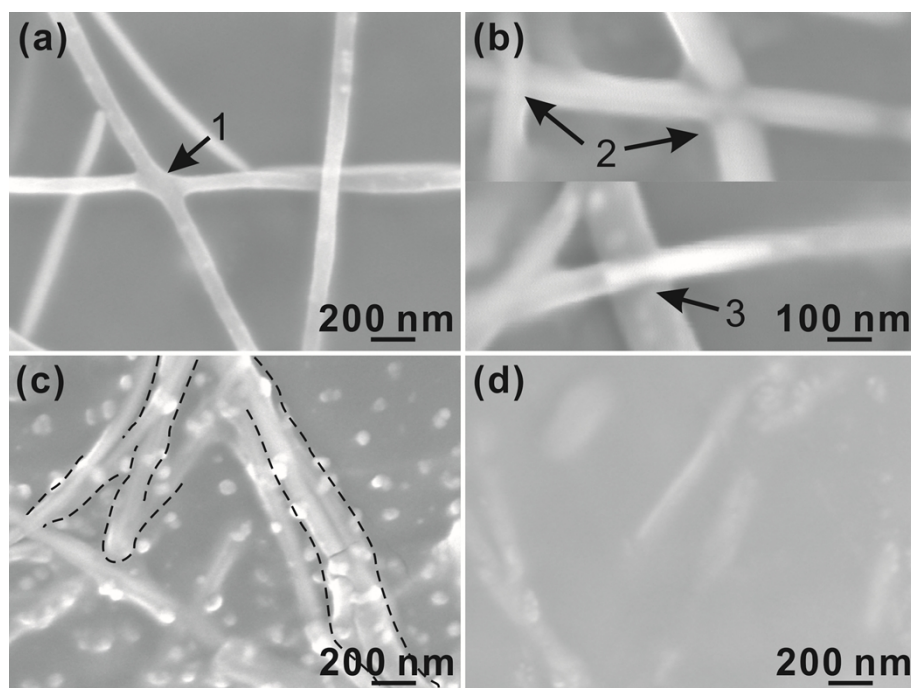

Fig. S6 SEM iamges: (a) the melting junctions between Ag/CNFs-Ag/CNFs (arrow 1); (b) the interfused cross section between AgNWs-AgNWs (arrow 2) and AgNWs-Ag/CNFs (arrow 3); (c) **welding of adjacent AgNWs after high temperature treatment**; (d) the crossion in HCl soltuion with high concentration.

Table S1 Relationship between surface concentration of AgNWs and performance (sheet resistance and transmittance) of TCFs.

|                                                     |         |        |       |       |       |      |
|-----------------------------------------------------|---------|--------|-------|-------|-------|------|
| Surface concentration of AgNWs (mg/m <sup>2</sup> ) | 28      | 33     | 38    | 43    | 48    | 53   |
| Sheet resistance ( $\Omega$ /sq)                    | 13600.0 | 1200.0 | 581.8 | 232.3 | 132.7 | 95.5 |
| Transmittance at 550 nm (%)                         | 92.5    | 92.0   | 91.1  | 89.2  | 87.6  | 85.3 |
